# Supplementary figures and images for: Rhythmic coordination and ensemble dynamics in the hippocampal-prefrontal network during odor-place associative memory and decision making
Source: eLife journal article supplement (doi:10.7554/elife.79545), 2022-12-08

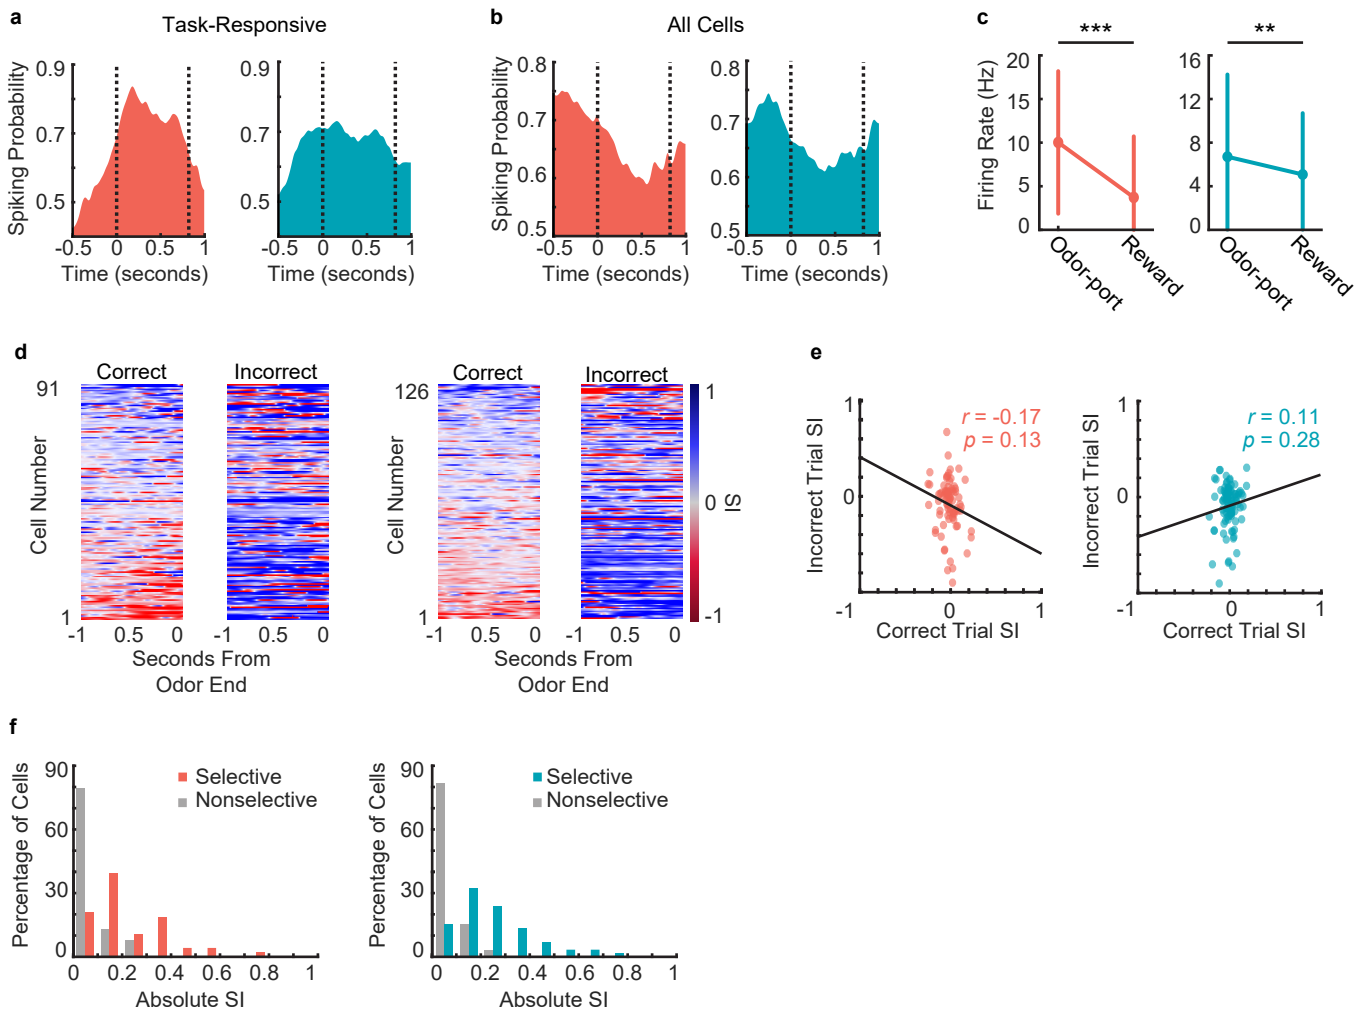

Supplement: supp [file elife-79545-supp-v1.zip]

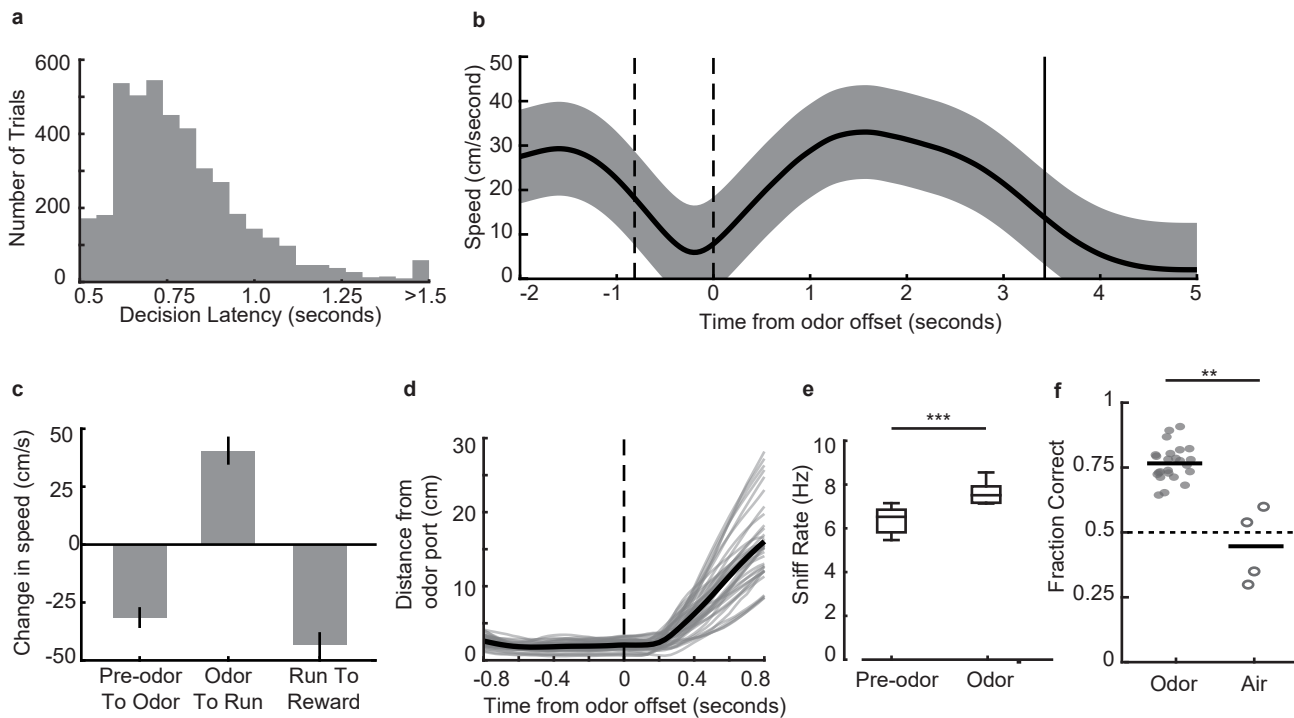

Supplement: supp [file elife-79545-supp-v1.zip]

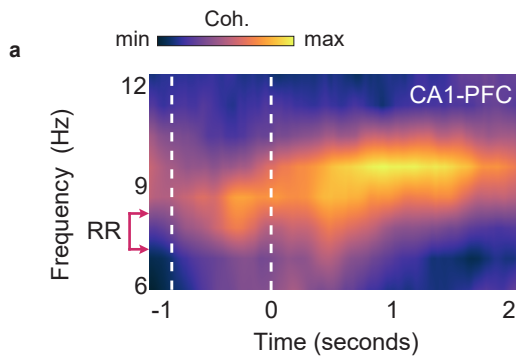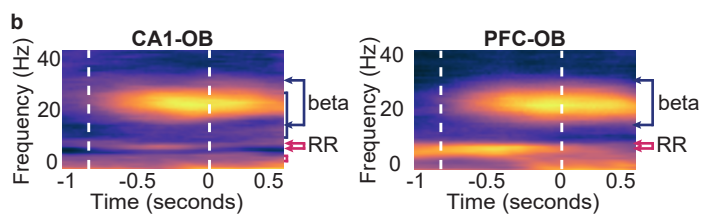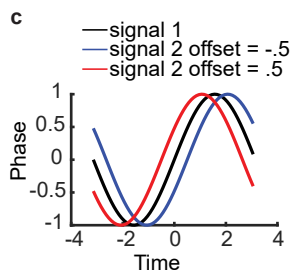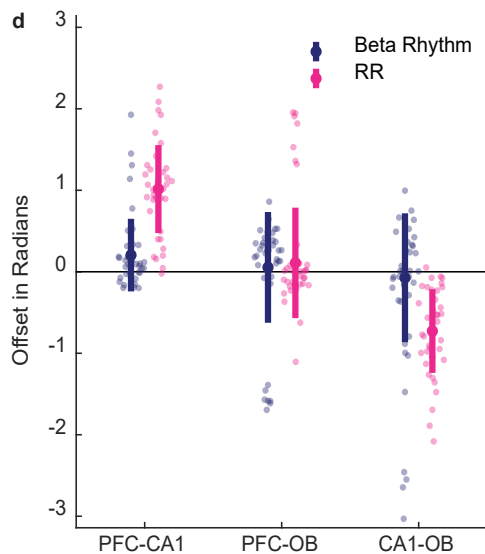

Supplement: supp [file elife-79545-supp-v1.zip]

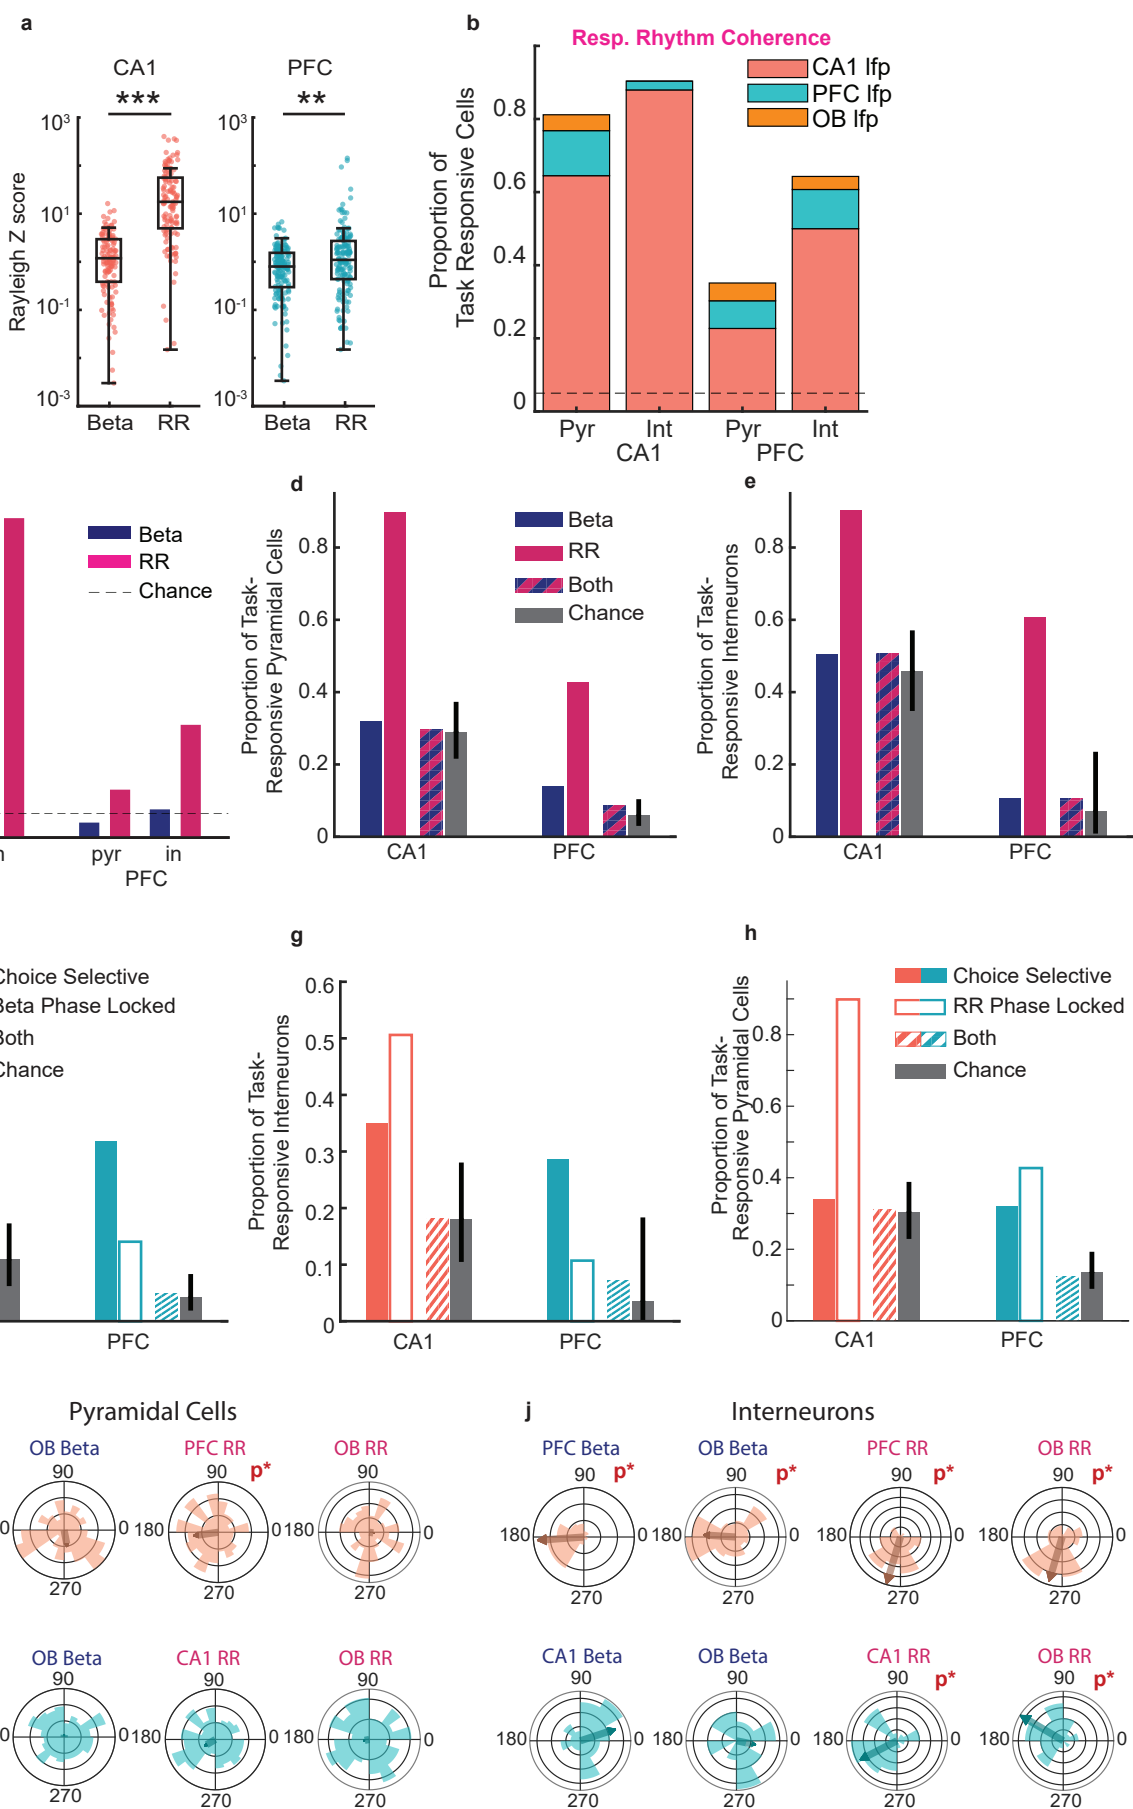

Supplement: supp [file elife-79545-supp-v1.zip]

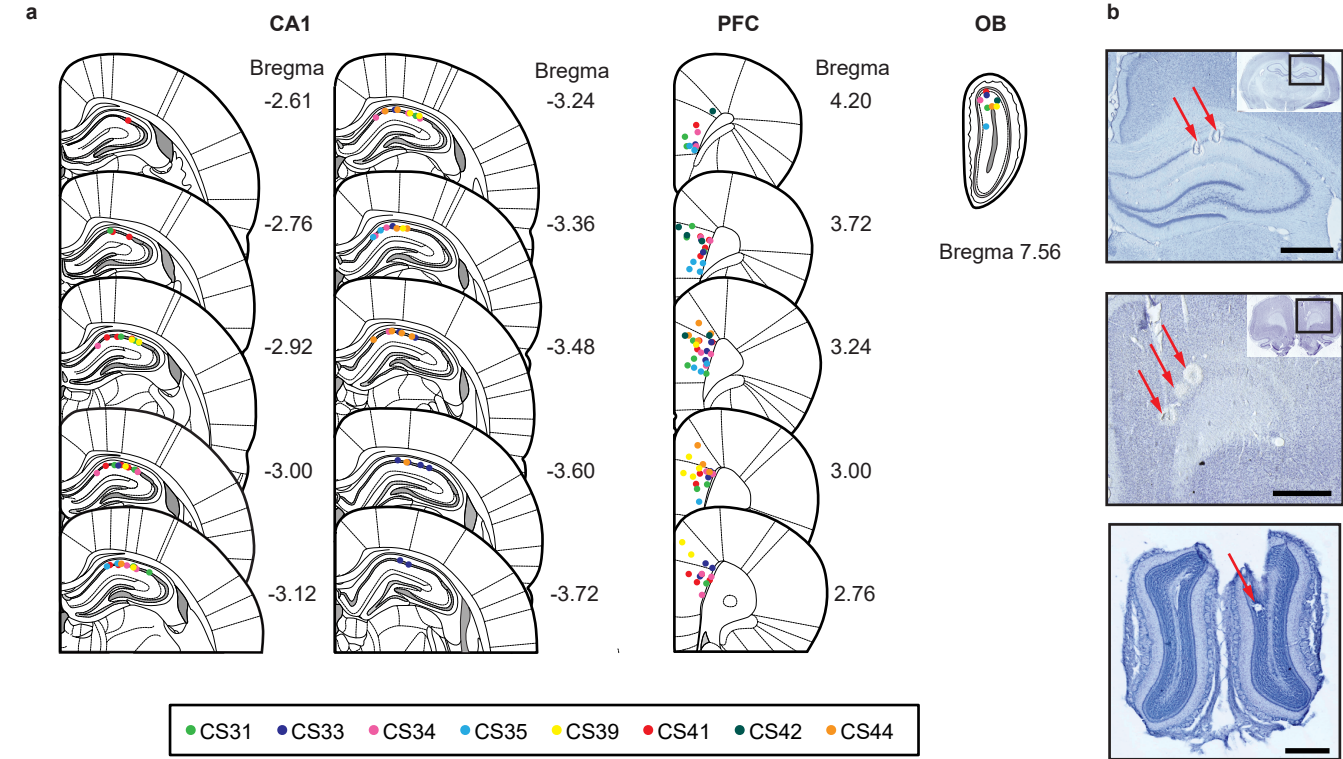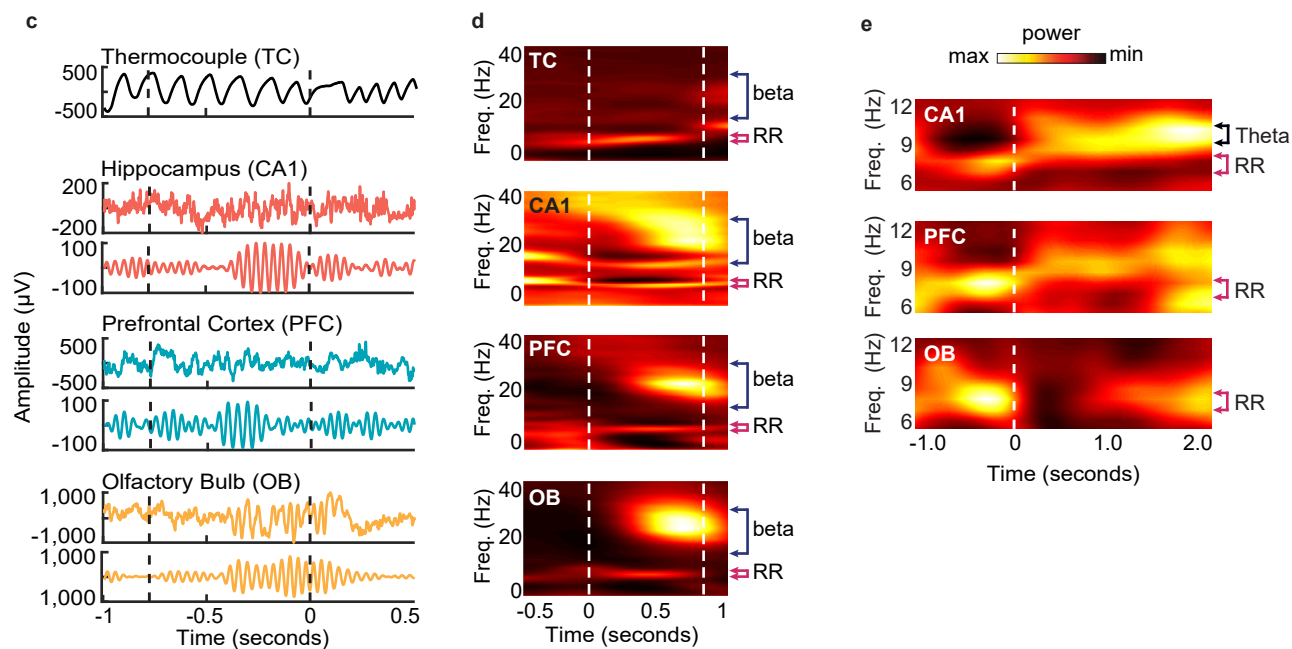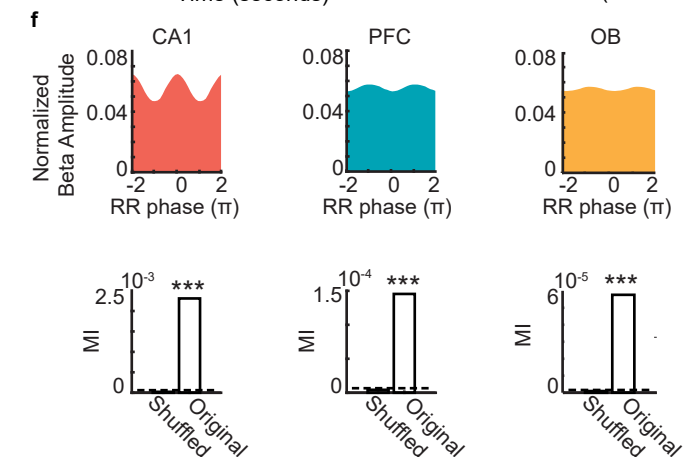

Supplement: supp [file elife-79545-supp-v1.zip]

## Cells in CA1

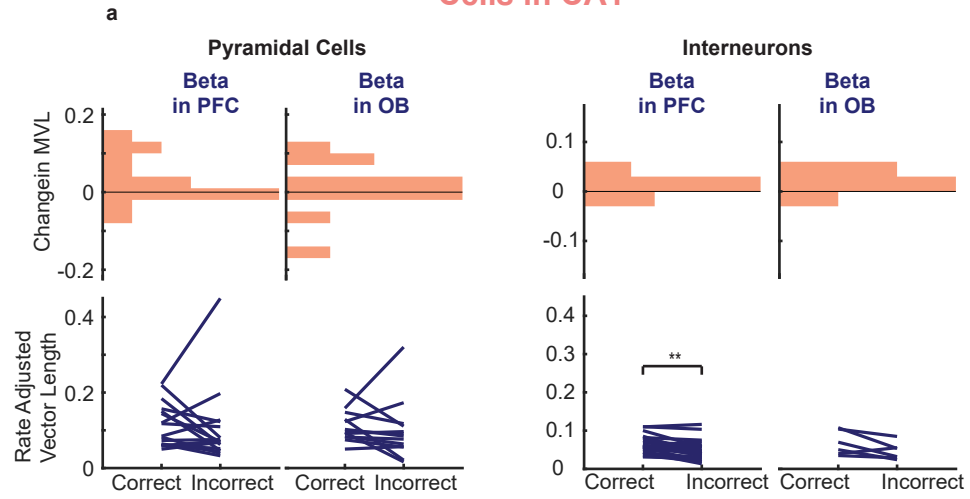

## Cells in PFC

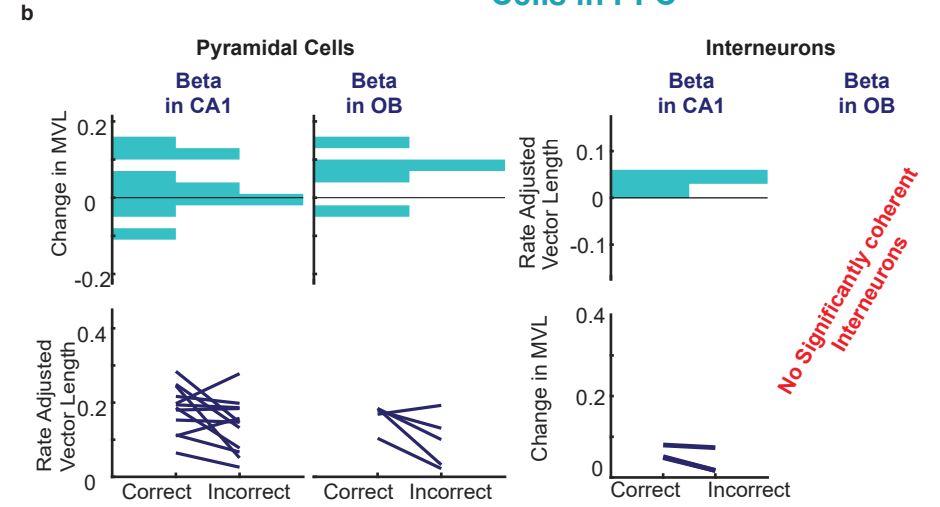

Supplement: supp [file elife-79545-supp-v1.zip]

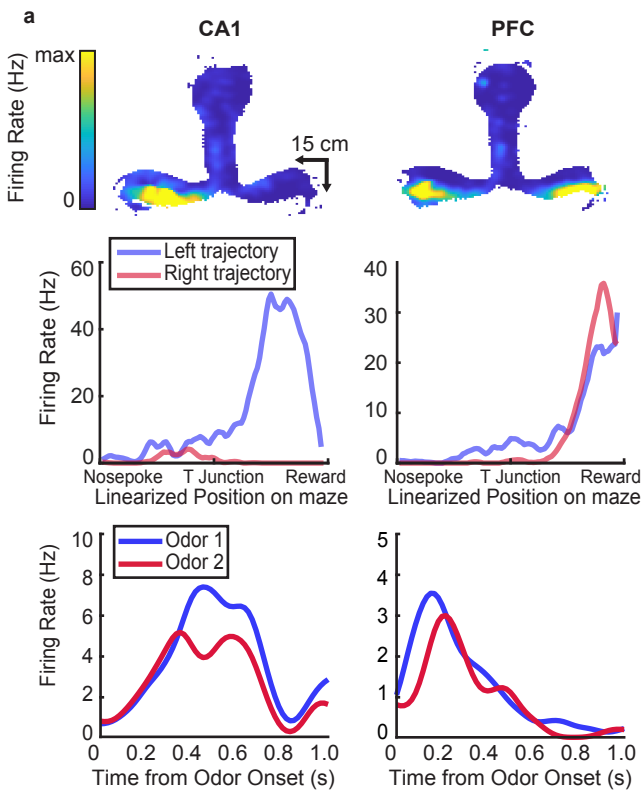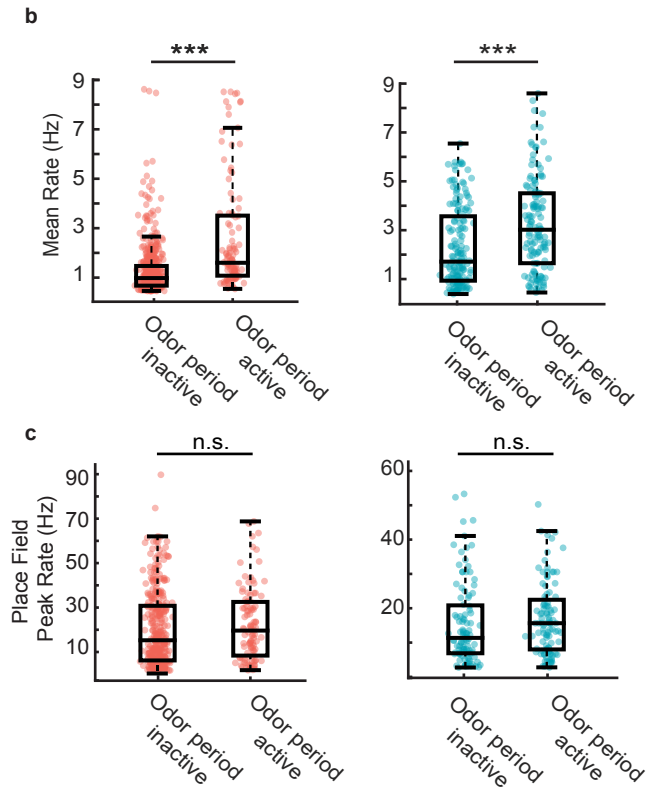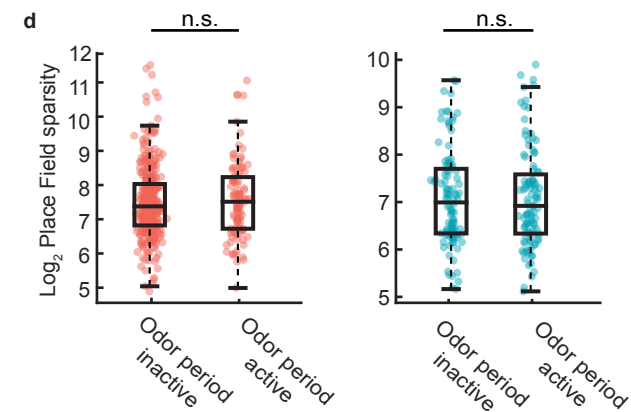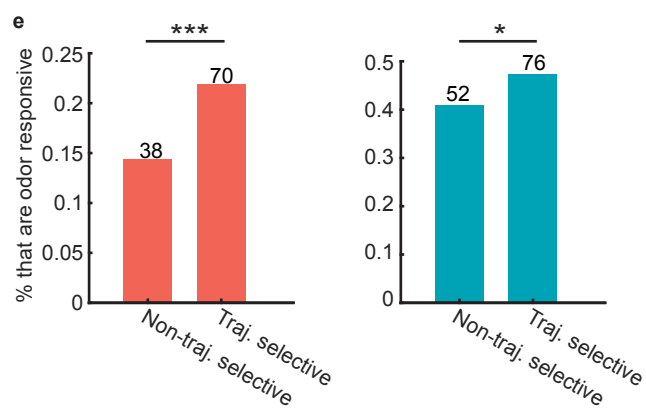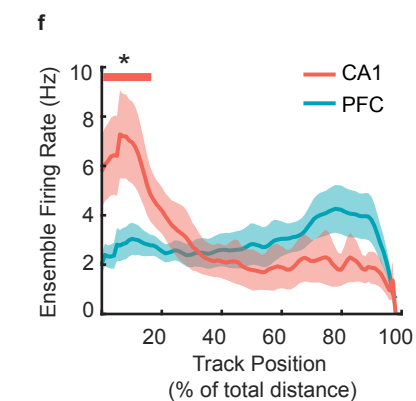

Supplement: supp [file elife-79545-supp-v1.zip]
